# Supplementary material for: Further Delineation of CANT1 Phenotypic Spectrum and Demonstration of Its Role in Proteoglycan Synthesis
Source: PubMed Central journal article supplement (PMC3427906; doi:10.1002/humu.22104), 2012-04-26
Supplement: humu0033-1261-SD1.pdf [file humu0033-1261-SD1.pdf]

**Supp. Table S1. Sequences of *CANT1* primers**

| <b>Primer name</b> | <b>Sequence (5'-3')</b> |
|--------------------|-------------------------|
| CANT1-1 F          | AAAAACACAAACCACAGCTC    |
| CANT1-1 R          | GAGTCAGGGGGCAGAGAT      |
| CANT1-2(1) F       | TGTCTATGATCCTATCCCCTTC  |
| CANT1-2(1) R       | GAGTGCATAGACTCATTCCATTC |
| CANT1-2(2) F       | GAACTAAGATGTGACTGGGCTTG |
| CANT1-2(2) R       | AATCAGGTCCGATAGCTCCAT   |
| CANT1-2(3) F       | AGAGGAAAACACCTGGTTCAGTT |
| CANT1-2(3) R       | ATAAGCTCTTCCTCCTAGAACT  |
| CANT1-3 F          | AGTCAGGTGCGGGGTCTAAG    |
| CANT1-3 R          | GGCTGTGGAAGCCACACT      |
| CANT1-4(1) F       | AGCCCCTTGCCTGCTACT      |
| CANT1-4(1) R       | AGCATGGAAAGCAGTTCAGAC   |
| CANT1-4(2) F       | GGTTGGAGGTCTGGACAGG     |
| CANT1-4(2) R       | GTGATAAGATTTGGTGATTCCAC |
| CANT1-4(3) F       | GGCTGTGCAGTACTTTGAAGTTT |
| CANT1-4(3) R       | GCACAGGGACAGCCAGAG      |

**Supp. Table S2. Sequences of *CHST3* primers**

| <b>Primer name</b> | <b>Sequence (5'-3')</b> |
|--------------------|-------------------------|
| CHST3-1 F          | CTCCCCTCTCTCCCCTCTCT    |
| CHST3-1 R          | CGGTGTGGGTGTGCGCAGAT    |
| CHST3-2 F          | ACATCCTCTGCATTCCTCGT    |
| CHST3-2 R          | CATTTGCAGGTCCACAGAGA    |
| CHST3-3(1) F       | TGGAGGACTGCTTAGGGTTG    |
| CHST3-3(1) R       | CCCTGCTGGTTGAAGAACTC    |
| CHST3-3(2) F       | CAGGGGAGGAAGAGGAAGAG    |
| CHST3-3(2) R       | GCGGTTCTTGCAGTGGTACT    |
| CHST3-3(3) F       | CACCTGACTCAGTTCATGTTCC  |
| CHST3-3(3) R       | GTAGCGCACCAGCATGTAGC    |
| CHST3-3(4) F       | GAGGGAAGAGGAGGTGCAG     |
| CHST3-3(4) R       | TTCACGAGGAGGGGCATAC     |
